# Supplementary material
Source: MDPI journal article supplement (https://www.mdpi.com/2073-4441/15/1/153)
Supplement: s1 [file s1 › water-2033506-supplementary.pdf]

## ***Supplementary Material***

The following materials are included:

**Figure S1.** Concentrations of TN and TP in the water column changed over time.

**Figure S2.** Biomass and density of the two snails changed over time in each mesocosm of control and warming treatment without fish present.

**Figure S3.** Relative biomass and density of both snails in each treatment.

**Figure S4.** Mean size of the snails during the experiment in each treatment.

**Table S1.** Means of the measured response variables and snail biomass and density during the experiment for different treatments.

**Table S2.** Weibull fitted results for biomass and density of each snail in each mesocosm in the control and warming treatment without fish.

**Table S3.** Differences of peaks of biomass and density of *R. swinhoei* between control and warming treatment without fish present.

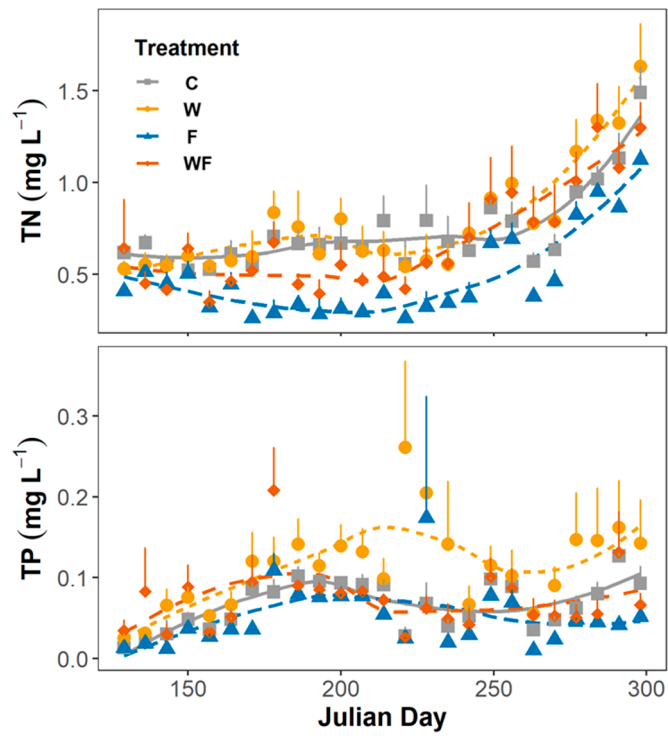

**Figure S1.** Concentrations of TN and TP in the water column changed over time. Vertical bars are standard errors. C for control, W for warming, F for predation and WF for warming and predation.

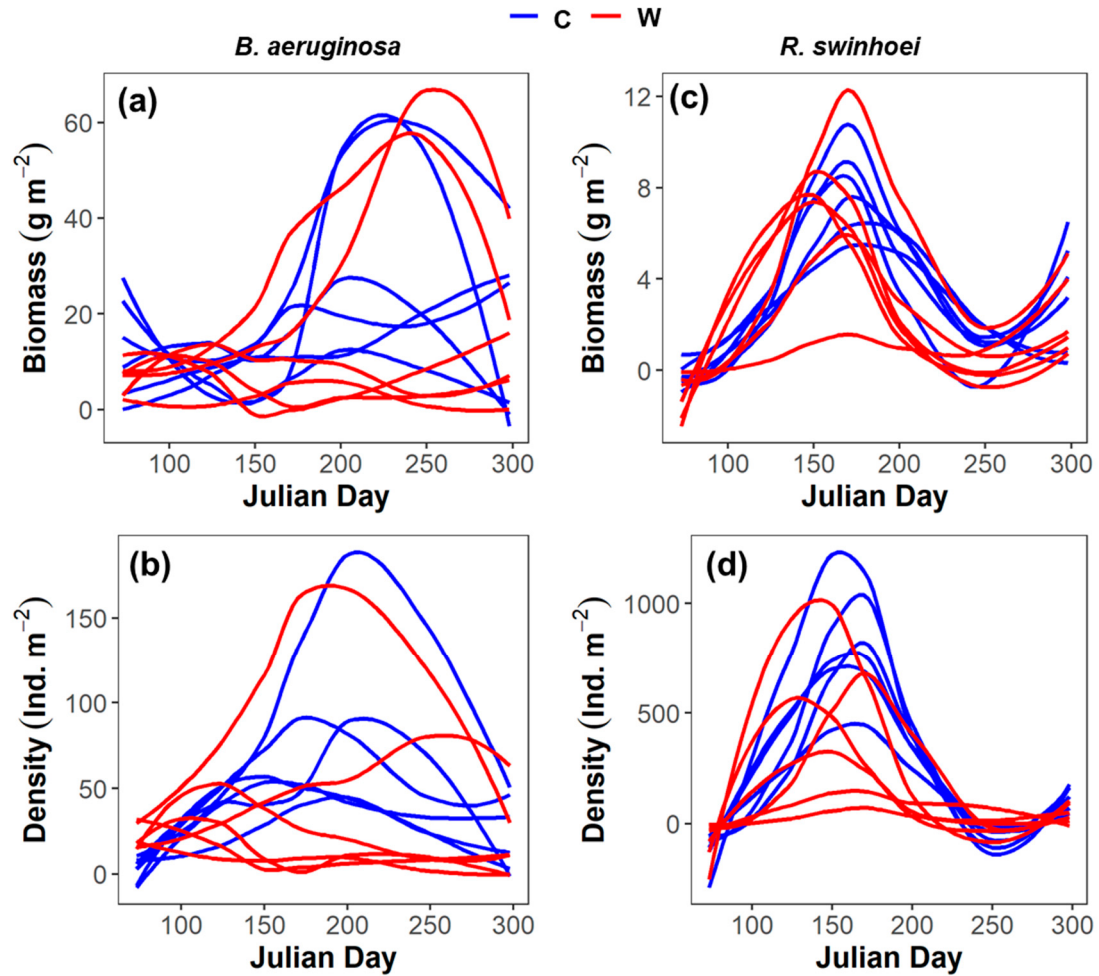

**Figure S2.** Biomass and density of the two snails changed over time in each mesocosm of control and warming treatment without fish present. Biomass (a) and density (b) of *B. aeruginosa*, and biomass (c) and density (d) of *R. swinhoel*. Blue indicates control and red indicates warming. The curves were fitted from the loess model in R package ggplot2. Weibull fitting results for biomass and density of each snail in each mesocosm can be found in Table S2.

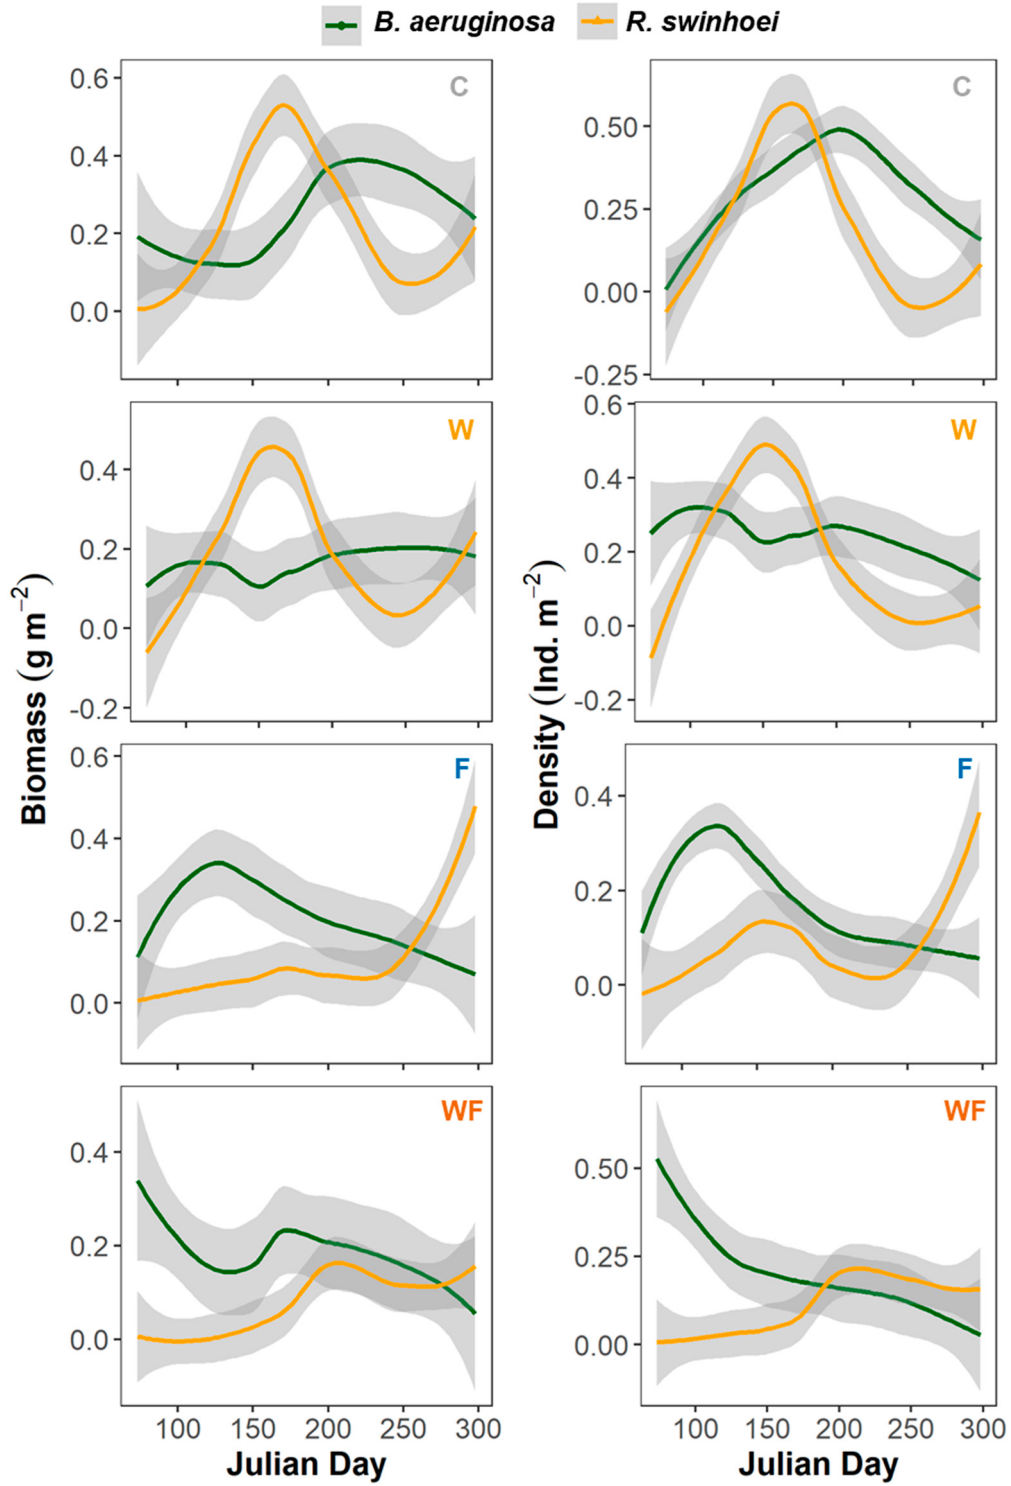

**Figure S3.** Relative biomass and density of both snails in each treatment. Data were normalized in each mesocosm by each snail (data were divided by the maximum value in each mesocosm) to diminish their different scales. The curves were fitted from the loess model in R package ggplot2. C for control, W for warming, F for predation and WF for warming and predation.

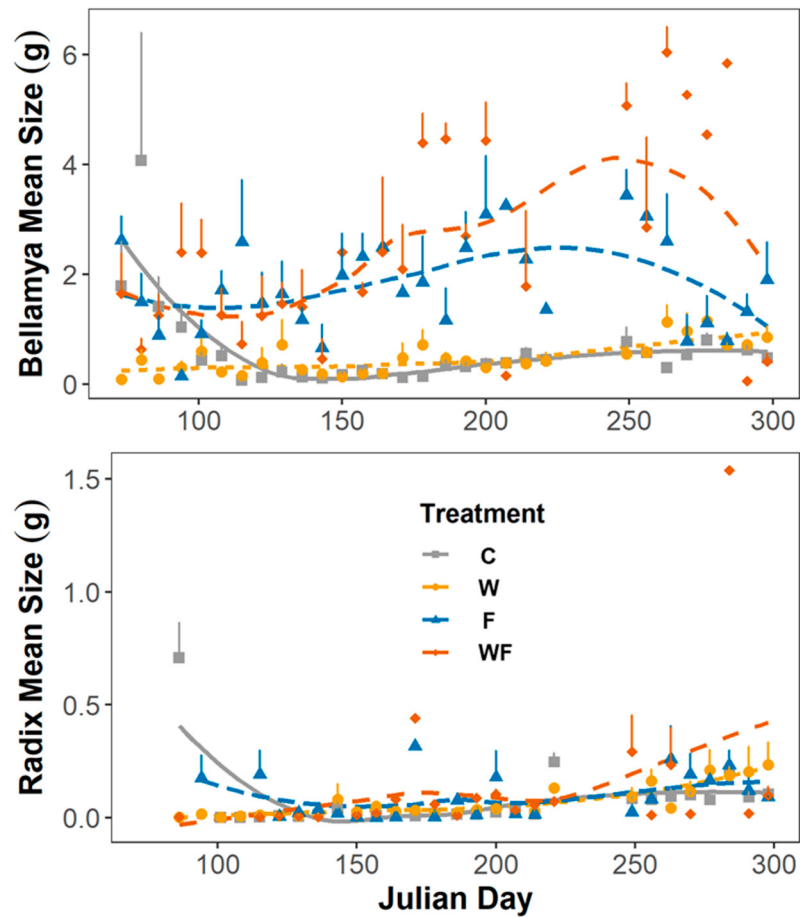

**Figure S4.** Mean size of the snails during the experiment in each treatment. Snail mean size = snail biomass/ snail density, in each mesocosm at each sampling date. Fish predation significantly increased mean size of *B. aeruginosa* during the experiment ( $\chi^2 = 127.4$ ,  $p < 0.0001$ ). No treatment effects were found for mean size of *R. swinhoei*.

**Table S1.** Means of the measured response variables and snail biomass and density during the experiment for different treatments.

|                                            | <b>Parameters</b> | <b>Treatment</b> | <b>N</b> | <b>Mean</b> | <b>SD</b> | <b>SE</b> |
|--------------------------------------------|-------------------|------------------|----------|-------------|-----------|-----------|
| <b>Measured<br/>response<br/>variables</b> | Turbidity         | Control          | 198      | 4.63        | 5.01      | 0.36      |
|                                            |                   | Warming          | 198      | 4.50        | 5.10      | 0.36      |
|                                            |                   | Fish             | 198      | 38.84       | 77.62     | 5.52      |
|                                            |                   | Fish*Warming     | 198      | 100.28      | 115.84    | 8.23      |
|                                            | Chl. a            | Control          | 198      | 6.11        | 5.95      | 0.42      |
|                                            |                   | Warming          | 198      | 4.99        | 5.83      | 0.41      |
|                                            |                   | Fish             | 198      | 12.53       | 9.82      | 0.70      |
|                                            |                   | Fish*Warming     | 198      | 16.29       | 9.15      | 0.65      |
|                                            | Periphyton        | Control          | 198      | 3.10        | 2.75      | 0.20      |
|                                            |                   | Warming          | 198      | 8.49        | 10.44     | 0.74      |
|                                            |                   | Fish             | 198      | 9.85        | 11.47     | 0.81      |
|                                            |                   | Fish*Warming     | 198      | 21.65       | 21.41     | 1.52      |
| <b><i>B. aeruginosa</i></b>                | Biomass           | Control          | 198      | 17.68       | 22.41     | 1.59      |
|                                            |                   | Warming          | 198      | 14.04       | 23.43     | 1.67      |
|                                            |                   | Fish             | 198      | 17.52       | 24.48     | 1.74      |
|                                            |                   | Fish*Warming     | 198      | 12.96       | 23.14     | 1.64      |
|                                            | Density           | Control          | 198      | 47.46       | 48.96     | 3.48      |
|                                            |                   | Warming          | 198      | 35.43       | 49.44     | 3.51      |
|                                            |                   | Fish             | 198      | 11.95       | 17.32     | 1.23      |
|                                            |                   | Fish*Warming     | 198      | 7.16        | 10.23     | 0.73      |
| <b><i>R. swinhoei</i></b>                  | Biomass           | Control          | 198      | 3.16        | 4.02      | 0.29      |
|                                            |                   | Warming          | 198      | 2.63        | 4.13      | 0.29      |
|                                            |                   | Fish             | 198      | 1.05        | 3.23      | 0.23      |
|                                            |                   | Fish*Warming     | 198      | 1.01        | 3.53      | 0.25      |
|                                            | Density           | Control          | 198      | 275.85      | 421.41    | 29.95     |
|                                            |                   | Warming          | 198      | 161.04      | 302.27    | 21.48     |
|                                            |                   | Fish             | 198      | 13.49       | 33.65     | 2.39      |
|                                            |                   | Fish*Warming     | 198      | 19.23       | 57.98     | 4.12      |

**Table S2.** Weibull fitted results for biomass and density of each snail in each mesocosm in the control and warming treatment without fish. Numbers in red indicate poor fittings.

| Response variable | Treatment | Mesocosm number | <i>B. aeruginosa</i> |            |       | <i>R. swinhoi</i> |            |       |
|-------------------|-----------|-----------------|----------------------|------------|-------|-------------------|------------|-------|
|                   |           |                 | Time of peak         | Peak value | $r^2$ | Time of peak      | Peak value | $r^2$ |
| Biomass           | Control   | C1              | 190.74               | 66.42      | 0.71  | 172.98            | 17.71      | 0.85  |
|                   |           | C2              | 59.73                | 32.64      | 0.34  | 178.27            | 15.81      | 0.76  |
|                   |           | C3              | 207.57               | 118.24     | 0.80  | 179.58            | 7.45       | 0.52  |
|                   |           | C4              | 271.18               | 52.26      | 0.49  | 185.19            | 5.68       | 0.51  |
|                   |           | C5              | 190.28               | 43.31      | 0.29  | 168.52            | 10.91      | 0.80  |
|                   |           | C6              | 293.73               | 24.38      | 0.37  | 162.41            | 13.35      | 0.71  |
|                   | Warming   | W1              | Not applicable       |            |       | 156.39            | 8.94       | 0.63  |
|                   |           | W2              | 102.83               | 33.23      | 0.47  | 180.80            | 2.68       | 0.59  |
|                   |           | W3              | 176.86               | 17.21      | 0.65  | 131.95            | 10.76      | 0.66  |
|                   |           | W4              | 100.27               | 50.59      | 0.64  | 156.27            | 7.94       | 0.70  |
|                   |           | W5              | 190.18               | 58.97      | 0.57  | 165.83            | 12.52      | 0.82  |
|                   |           | W6              | 220.60               | 108.24     | 0.75  | 178.42            | 20.83      | 0.81  |
| Density           | Control   | C1              | 210.07               | 169.04     | 0.76  | 166.61            | 1327.17    | 0.91  |
|                   |           | C2              | 177.59               | 89.45      | 0.79  | 160.21            | 1463.66    | 0.95  |
|                   |           | C3              | 205.49               | 135.13     | 0.84  | 175.04            | 627.79     | 0.72  |
|                   |           | C4              | 160.72               | 132.83     | 0.60  | 162.49            | 762.69     | 0.79  |
|                   |           | C5              | 226.06               | 49.63      | 0.44  | 163.22            | 968.08     | 0.81  |
|                   |           | C6              | 175.59               | 53.65      | 0.41  | 165.72            | 2086.49    | 0.95  |
|                   | Warming   | W1              | 106.26               | 58.62      | 0.74  | 135.22            | 300.86     | 0.97  |
|                   |           | W2              | 126.52               | 88.75      | 0.88  | 150.08            | 111.44     | 0.94  |
|                   |           | W3              | Not applicable       |            |       | 127.13            | 1417.38    | 0.76  |
|                   |           | W4              | 91.55                | 62.54      | 0.87  | 124.16            | 671.83     | 0.86  |
|                   |           | W5              | 189.65               | 205.28     | 0.67  | 152.24            | 498.60     | 0.84  |
|                   |           | W6              | 160.61               | 115.70     | 0.76  | 175.37            | 1130.37    | 0.96  |

**Table S3.** Differences of peaks of biomass and density of *R. swinhoei* between control and warming treatment without fish present. A six parameters Weibull function was fitted for each mesocosm. Independent t-tests were used to compare the differences between control and warming treatment without fish present. n = 6.

| <b>Response variable</b> | <b>Peak traits</b>                   | <b>Control</b> | <b>Warming</b> | <b>t</b>                | <b>p</b>    |
|--------------------------|--------------------------------------|----------------|----------------|-------------------------|-------------|
| Biomass                  | Peak biomass (g m <sup>-2</sup> )    | 11.8 ± 4.7     | 10.6 ± 6.0     | t <sub>10</sub> = 0.39  | 0.77        |
|                          | Time of peak (Julian day)            | 174.5 ± 8.2    | 161.6 ± 17.9   | t <sub>10</sub> = 1.60  | 0.14        |
| Density                  | Peak density (Ind. m <sup>-2</sup> ) | 1206 ± 537     | 688 ± 499      | t <sub>10</sub> = 1.73  | 0.11        |
|                          | Time of peak (Julian day)            | 165.5 ± 5.2    | 144.0 ± 19.2   | t <sub>5.7</sub> = 2.65 | <b>0.04</b> |
